# Supplementary material
Source: PubMed Central journal article supplement (PMC4256506)

**Supplementary Figure S1: Comparison of the differentially abundant proteins in the current study with the published pooled OPC proteome (Slebos *et al*, 2013).**

- (A) Fold changes of the 1,626 commonly identified protein groups in the current study vs. the Slebos *et al* study.  
(B) Protein ratios as a function of statistical significance of protein groups identified in the current study.  
(C) Protein ratios as a function of statistical significance of protein groups identified by Slebos *et al*.  
(D) Overlap of protein groups with significantly lower, significantly higher and un-changed abundance in HPV+ vs. HPV- OPC in the current study (white circles) and the Slebos *et al* study (colored circles).

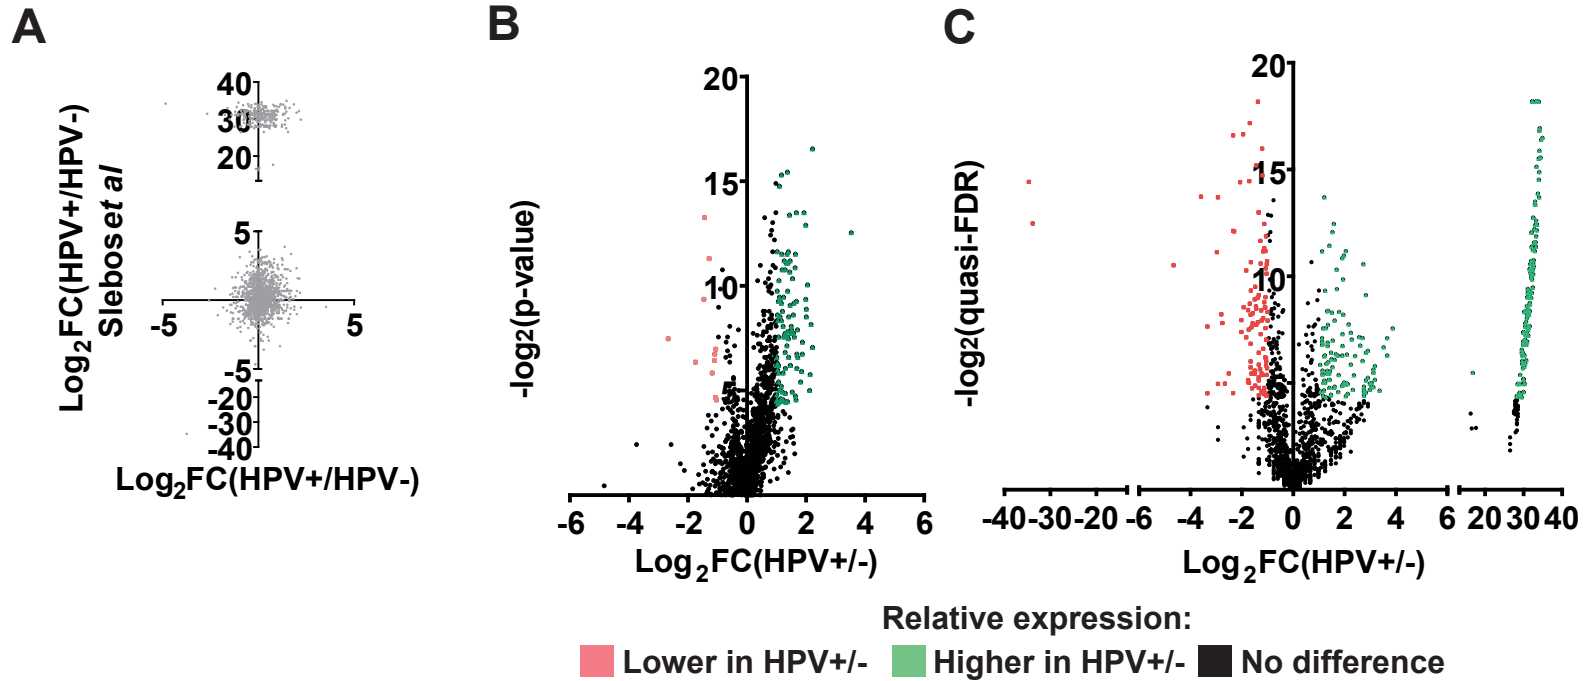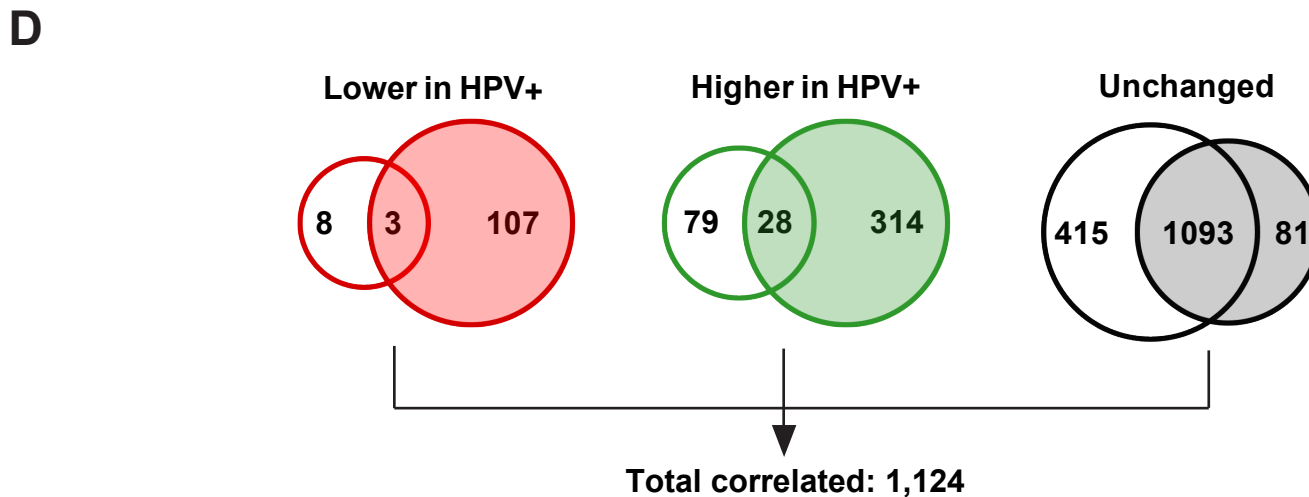

Supplement: supp_M114.041764_mcp.M114.041764-13.pdf [file supp_M114.041764_mcp.M114.041764-13.pdf]
